# Supplementary material for: Effect of coenzyme Q10 on cardiac function and survival in heart failure: an overview of systematic reviews and meta-analyses
Source: Royal Society of Chemistry journal article supplement (doi:10.1039/d3fo01255g), 2023-01-01
Supplement: d3fo01255g1.pdf [file d3fo01255g1.pdf]

**SUPPLEMENTARY MATERIAL**

**Effect of coenzyme Q10 on cardiac function and survival in heart failure: an  
overview of systematic reviews**

**Food & Function**

## INDEX

**Table S1.** Search strategy.

**Table S2.** Excluded studies with justified reasons.

**Table S3.** Risk of bias assessment.

**Table S4.** Quality of evidence assessment.

**Table S1.** Search strategy.

- Medline, Scopus, Web of Science, Cochrane Library:

|                                                                                                        |            |                                                                                                                                           |            |                                                 |
|--------------------------------------------------------------------------------------------------------|------------|-------------------------------------------------------------------------------------------------------------------------------------------|------------|-------------------------------------------------|
| Heart failure<br><b>OR</b><br>Heart disease<br><b>OR</b><br>Cardiovascular disease<br><b>OR</b><br>Cvd | <b>AND</b> | Q10<br><b>OR</b><br>CoQ10<br><b>OR</b><br>Coenzyme Q10<br><b>OR</b><br>Ubiquinone<br><b>OR</b><br>Ubiquinol<br><b>OR</b><br>Ubidecarenone | <b>AND</b> | Sistematic review<br><b>OR</b><br>Meta-analysis |
|--------------------------------------------------------------------------------------------------------|------------|-------------------------------------------------------------------------------------------------------------------------------------------|------------|-------------------------------------------------|

- Grey literature:

Not specified.

**Table S2.** Excluded studies with justified reasons.

| <b>Reference</b>                    | <b>Main reason</b>      |
|-------------------------------------|-------------------------|
| Banach M et al (2015) <sup>37</sup> | Not outcome of interest |
| Pepe S et al (2007) <sup>38</sup>   | Not design of interest  |

\*References at main manuscript

**Table S3.** Risk of bias assessment.

| Reference                  | 1   | 2   | 3   | 4   | 5   | 6   | 7   | 8   | 9   | 10  | 11  | 12  | 13  | 14  | 15  | 16  | Overall       |
|----------------------------|-----|-----|-----|-----|-----|-----|-----|-----|-----|-----|-----|-----|-----|-----|-----|-----|---------------|
| Al Saadi T et al (2021)    | YES | NO  | YES | Low           |
| Ba Y-J et al (2016)        | YES | NO  | YES | YES | YES | YES | NO  | YES | YES | NO  | YES | NO  | NO  | YES | NO  | NO  | Critially Low |
| Fotino A et al (2013)      | YES | NO  | YES | YES | YES | YES | NO  | YES | YES | YES | YES | YES | NO  | YES | YES | YES | Critially Low |
| Lei L et al (2017)         | YES | NO  | YES | PY  | NO  | YES | NO  | YES | YES | NO  | YES | YES | YES | YES | YES | YES | Critially Low |
| Madmani M et al (2013)     | YES | NO  | YES | YES | YES | YES | NO  | YES | Low           |
| Rosenfeldt F et al (2003)  | YES | NO  | YES | YES | NO  | NO  | NO  | NO  | NO  | NO  | YES | NO  | NO  | NO  | NO  | NO  | Critially Low |
| Sander S et al (2006)      | YES | NO  | YES | YES | YES | NO  | YES | YES | NO  | NO  | YES | NO  | NO  | YES | YES | NO  | Critially Low |
| Soja A et al (1997)        | YES | NO  | YES | NO  | NO  | NO  | YES | YES | NO  | NO  | YES | NO  | NO  | YES | NO  | NO  | Critially Low |
| Trongtorsak A et al (2017) | YES | NO  | YES | NO  | YES | NO  | NO  | NO  | NO  | NO  | YES | NO  | NO  | NO  | NO  | NO  | Critially Low |
| Yu Mareev V et al (2022)   | YES |     | YES | NO  | NO  | NO  | NO  | YES | YES | NO  | YES | YES | YES | YES | NO  | NO  | Critially Low |

**Table S4.** Quality of evidence assessment.

| N° studies                 | Design | Certainty assessment |               |                   |              |                      | Effect size     | Certainty |
|----------------------------|--------|----------------------|---------------|-------------------|--------------|----------------------|-----------------|-----------|
|                            |        | Risk of bias         | Inconsistency | Indirect evidence | Imprecision  | Other considerations |                 |           |
| <b>Ejection fraction</b>   |        |                      |               |                   |              |                      |                 |           |
| 9                          | RCTs*  | Very serious         | Not serious   | Not serious       | Not serious  | -                    | View in Figures | Low       |
| <b>Cardiac output</b>      |        |                      |               |                   |              |                      |                 |           |
| 2                          | RCTs*  | Very serious         | Serious       | Not serious       | Not serious  | -                    | View in Figures | Very low  |
| <b>Cardiac index</b>       |        |                      |               |                   |              |                      |                 |           |
| 2                          | RCTs*  | Very serious         | Serious       | Not serious       | Not serious  | -                    | View in Figures | Very low  |
| <b>Stroke volume</b>       |        |                      |               |                   |              |                      |                 |           |
| 2                          | RCTs*  | Very serious         | Serious       | Not serious       | Serious      | -                    | View in Figures | Very low  |
| <b>Exercise capacity</b>   |        |                      |               |                   |              |                      |                 |           |
| 4                          | RCTs*  | Very serious         | No serious    | Not serious       | Very serious | -                    | View in Figures | Very low  |
| <b>NYHA Classification</b> |        |                      |               |                   |              |                      |                 |           |
| 3                          | RCTs*  | Very serious         | No serious    | Not serious       | Very serious | -                    | View in Figures | Very low  |
| <b>Mortality</b>           |        |                      |               |                   |              |                      |                 |           |
| 6                          | RCTs*  | Very serious         | Not serious   | Not serious       | Not serious  | Strong association   | View in Figures | Moderate  |
| <b>Hospitalisations</b>    |        |                      |               |                   |              |                      |                 |           |
| 2                          | RCTs*  | Very serious         | Not serious   | Not serious       | Not serious  | Strong association   | View in Figures | Moderate  |
| <b>CoQ10 levels</b>        |        |                      |               |                   |              |                      |                 |           |
| 5                          | RCTs*  | Very serious         | Not serious   | Not serious       | Not serious  | Strong association   | View in Figures | Moderate  |

\*Meta-analysis of randomised controlled trials.
